# Supplementary material
Source: Elsevier journal article supplement (https://rcastoragev2.blob.core.windows.net/064c95b6222cfd70b22b246ea8c3fe4b/mmc1.pdf)
Supplement: mmc1 [file mmc1.pdf]

## Supplemental Information

### Genomic Adaptations and Evolutionary

### History of the Extinct Scimitar-Toothed Cat,

### *Homotherium latidens*

Ross Barnett, Michael V. Westbury, Marcela Sandoval-Velasco, Filipe Garrett Vieira, Sungwon Jeon, Grant Zazula, Michael D. Martin, Simon Y.W. Ho, Niklas Mather, Shyam Gopalakrishnan, Jazmín Ramos-Madrigal, Marc de Manuel, M. Lisandra Zepeda-Mendoza, Agostinho Antunes, Aldo Carmona Baez, Binia De Cahsan, Greger Larson, Stephen J. O'Brien, Eduardo Eizirik, Warren E. Johnson, Klaus-Peter Koepfli, Andreas Wilting, Jörns Fickel, Love Dalén, Eline D. Lorenzen, Tomas Marques-Bonet, Anders J. Hansen, Guojie Zhang, Jong Bhak, Nobuyuki Yamaguchi, and M. Thomas P. Gilbert

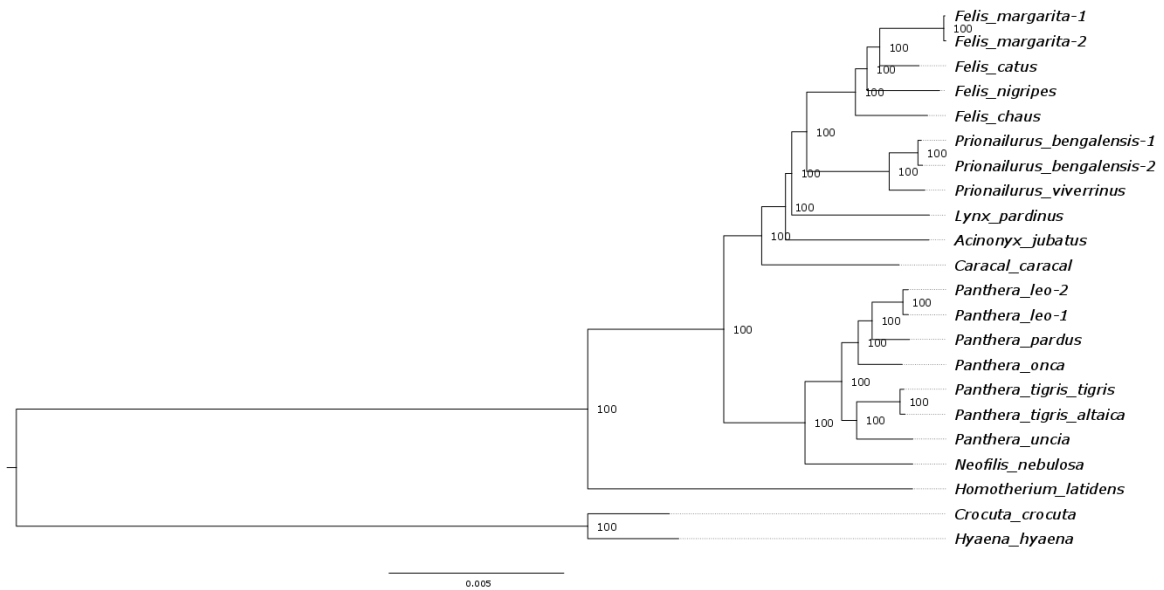

**Figure S1: Maximum likelihood phylogenetic tree constructed using a concatenated supermatrix of 29,216,712 bp. Related to Figure 1 and STAR methods phylogenetic analyses.** Numbers at the nodes show bootstrap support values. Branch lengths show the average number of substitutions per site.

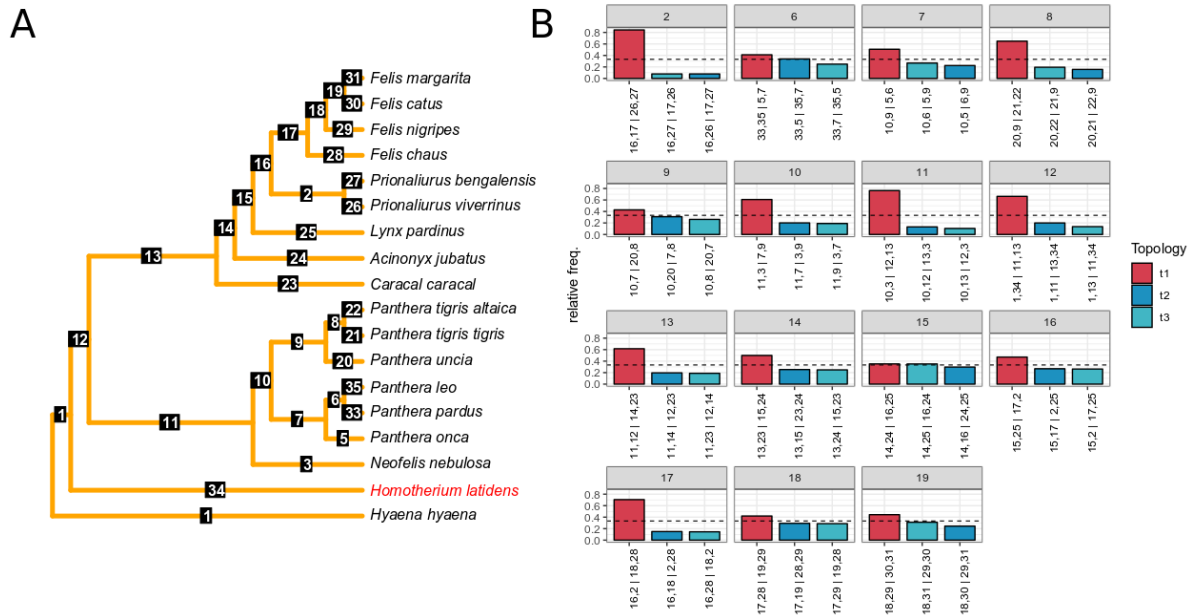

**Figure S2. Phylogenetic analyses for tree topology discordances in the Felidae. Related to Figure 1 and STAR methods phylogenetic analyses.** **A)** Species tree under the multispecies coalescent inferred from the maximum-likelihood gene trees. Branches have been numerically labelled for easy identification. **B)** Relative frequencies of the three possible bipartitions (possible arrangements of a quartet on an unrooted tree) induced by each internal branch of the estimated species tree. X axis numbers correspond to branch labels in A written in a quartet fashion based on the topology ([A,B],[C,D]). Dashed lines show the threshold value of  $\frac{1}{3}$ , shown theoretically to be the minimum frequency for a true bipartition. Related to Figure 1 and STAR methods phylogenetic analyses.

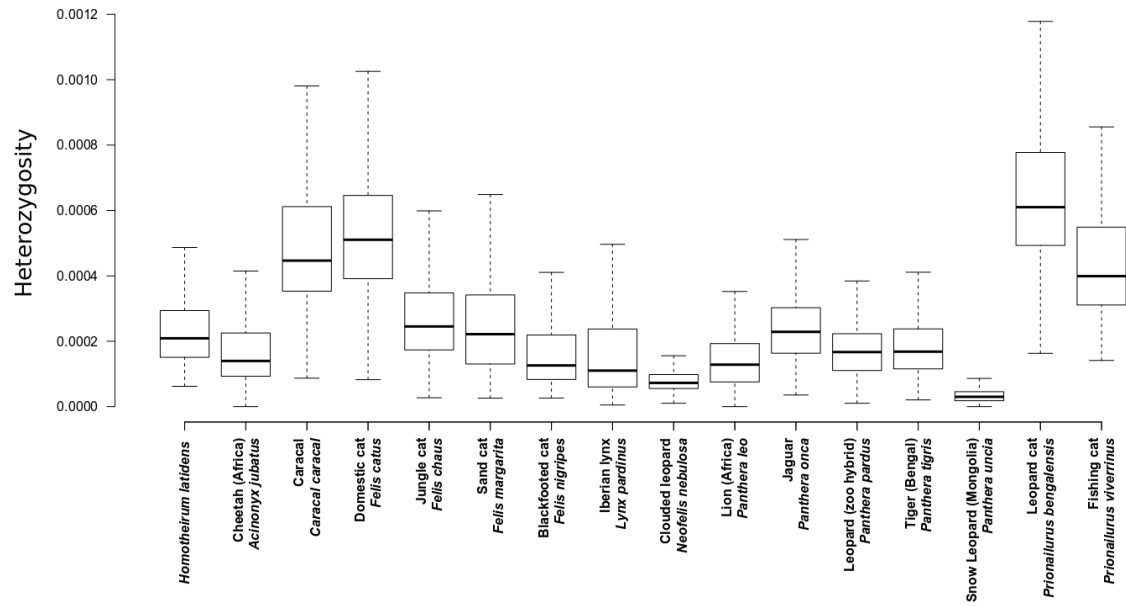

**Figure S3: Exome-wide heterozygosity estimates based single representatives for each species used in the current study. Related to Figure 3 and STAR methods genetic diversity.** Variance was estimated by independently calculating the average heterozygosity in non-overlapping windows of 200kb of covered bases.

| Node                               | Node age (Ma) <sup>a</sup> |                         |                             |                             |                 |
|------------------------------------|----------------------------|-------------------------|-----------------------------|-----------------------------|-----------------|
|                                    | Correlated-rates model     | Independent-rates model | Low rate prior: Gamma(1,50) | High rate prior: Gamma(1,2) | Prior (no data) |
| Root                               | 32.8                       | 32.3                    | 33.0                        | 32.8                        | 32.4            |
| <i>Homotherium</i> -sister         | 22.5                       | 16.7                    | 22.6                        | 22.6                        | 30.3            |
| Pantherinae-Felinae                | 14.1                       | 10.2                    | 14.1                        | 14.1                        | 28.3            |
| <i>Neofelis</i> - <i>Panthera</i>  | 8.3                        | 5.5                     | 8.3                         | 8.3                         | 23.3            |
| <i>Panthera</i>                    | 5.4                        | 3.4                     | 5.4                         | 5.4                         | 17.9            |
| <i>Caracal</i> -sister             | 11.3                       | 8.3                     | 11.3                        | 11.3                        | 24.9            |
| <i>Acinonyx</i> -sister            | 9.7                        | 7.1                     | 9.6                         | 9.7                         | 21.6            |
| <i>Lynx</i> -sister                | 9.2                        | 6.7                     | 9.2                         | 9.2                         | 17.2            |
| <i>Prionailurus</i> - <i>Felis</i> | 8.2                        | 6.0                     | 8.1                         | 8.2                         | 12.7            |
| <i>Felis</i>                       | 5.0                        | 3.8                     | 5.0                         | 5.0                         | 9.2             |

**Table S1 - Ages of key nodes in the phylogeny, estimated under a range of settings.**

**Related to Figure 1 and STAR methods phylogenomic dating.** The time-tree in Figure 1 is based on the correlated-rates model. <sup>a</sup>Correlated-rates model: Rates are assumed to be correlated between neighbouring branches in the phylogeny. Independent-rates model: Rates are assumed to be identically and independently distributed across branches in the phylogeny. Low rate prior: Gamma(1,50) prior for the rate, with a prior mean of 0.0002 substitutions/site/Myr. High rate prior: Gamma(1,2) prior for the rate, with a prior mean of 0.005 substitutions/site/Myr. Prior (no data): Analysis run without sequence data, such that the node ages are sampled from the joint prior.

| GeneName | OneRatio | FreeRatio | Biological role                                           | Functional role                |
|----------|----------|-----------|-----------------------------------------------------------|--------------------------------|
| AGBL5    | 0.97893  | 3.7966    | vision sensitivity to diurnal light and circadian rhythms | vision                         |
| AK3      | 1        | 2.5265    | endurance                                                 | mitochondria respiration       |
| B3GALNT2 | 1        | 4.501     | vision sensitivity to diurnal light and circadian rhythms | vision                         |
| C13orf30 | 1        | 2.3383    | unknown                                                   | unknown                        |
| CAPNS2   | 1        | 2.8782    | vision sensitivity to diurnal light and circadian rhythms | vision                         |
| ECSCR    | 1        | 3.4687    | endurance                                                 | angiogenesis                   |
| F5       | 0.0001   | 3.3227    | endurance                                                 | circulatory system             |
| GCM1     | 1        | 2.0195    | reproduction                                              | placenta                       |
| GOLT1A   | 1        | 4.4857    | cell function                                             | Golgi                          |
| GPRC5A   | 1        | 2.7265    | immunity                                                  | cancer                         |
| HMGB2    | 1        | 2.127     | immunity                                                  | fecundity                      |
| IQCF5    | 0.64872  | 2.3567    | unknown                                                   | unknown                        |
| ISCU     | 1        | 2.3704    | endurance                                                 | mitochondria respiration       |
| LAGE3    | 1        | 2.449     | cell function                                             | apoptosis                      |
| MIS18A   | 1        | 3.7168    | cell function                                             | mitosis                        |
| MMP12    | 1        | 2.2541    | endurance                                                 | respiratory/circulatory system |
| NTF3     | 1        | 4.3076    | socialisation                                             | nervous system                 |
| OR11A1   | 0.83912  | 3.7452    | olfaction                                                 | olfaction                      |
| Per1     | 0.02951  | 2.0949    | vision sensitivity to diurnal light and circadian rhythms | circadian clock                |
| PGD      | 1        | 2.8531    | bone mineralization                                       | bone mineralization            |
| Rplp1    | 0.0001   | 3.1993    | ribosome                                                  | protein synthesis              |
| Rps13    | 1        | 2.4235    | ribosome                                                  | protein synthesis              |
| SCTR     | 1        | 2.8874    | socialisation                                             | social behaviour               |
| SDPR     | 0.98745  | 2.3358    | endurance                                                 | angiogenesis                   |
| SFPQ     | 1        | 2.4583    | vision sensitivity to diurnal light and circadian rhythms | circadian clock                |

|         |         |        |                                                           |                          |
|---------|---------|--------|-----------------------------------------------------------|--------------------------|
| SLC1A7  | 1       | 2.1567 | vision sensitivity to diurnal light and circadian rhythms | vision                   |
| SPACA3  | 0.0001  | 3.0126 | reproduction                                              | sperm                    |
| STAP1   | 0.99486 | 2.2366 | cell function                                             | docking protein          |
| SURF1   | 1       | 2.1957 | endurance                                                 | mitochondria respiration |
| TAF8    | 0.97884 | 2.9587 | endurance                                                 | adipogenesis             |
| TMEM45A | 0.99662 | 4.899  | endurance                                                 | hypoxia                  |
| unknown | 0.99995 | 2.1152 | unknown                                                   | unknown                  |

**Table S3: 31 genes under positive selection in the *Homotherium* genome with high values (free-ratio > 2) detected using one-ratio/free-ratio models and their respective hypothetical biological and functional roles. Related to Figure 2 and STAR methods and tests of positive selection.**
